# Supplementary material for: Effects of Peptidoglycan, Lipoteichoic Acid and Lipopolysaccharide on Inflammation, Proliferation and Milk Fat Synthesis in Bovine Mammary Epithelial Cells
Source: PubMed Central journal article supplement (PMC7472015; doi:10.3390/toxins12080497), 2020-08-02
Supplement: toxins-12-00497-s001.pdf [file toxins-12-00497-s001.pdf]

# Supplementary Materials: Effects of Peptidoglycan, Lipoteichoic Acid and Lipopolysaccharide on Inflammation, Proliferation and Milk Fat Synthesis in Bovine Mammary Epithelial Cells

Yongjiang Wu, Yawang Sun, Zhu Zhang, Juncai Chen and Guozhong Dong

**Table S1.** The primer sequences of target genes and the internal reference gene (GAPDH).

| Genes                          | Primer sequences (5' to 3')                           | Product size/bp | Accession number |
|--------------------------------|-------------------------------------------------------|-----------------|------------------|
| <i>IL-1<math>\beta</math></i>  | F: AGTGCCTACGCACATGTCTTC<br>R: TCGTCACACAGAAACTCGTC   | 114             | NM_174093.1      |
| <i>IL-6</i>                    | F: TGCTGGTCTTCTGGAGTATC<br>R: GTGGCTGGAGTGGTTATTAG    | 153             | NM_173923.2      |
| <i>IL-8</i>                    | F: ATGACTTCCAAGCTGGCTGTTG<br>R: TTGATAAATTTGGGTGGAAAG | 149             | NM_173925.2      |
| <i>TNF-<math>\alpha</math></i> | F: CCACGTTGTAGCCGACATC<br>R: CCCTGAAGAGGACCTGTGAG     | 155             | XM_005223596.4   |
| <i>FASN</i>                    | F: AGGACCTCGTGAAGGCTGTGA<br>R: CCAAGGTCTGAAAGCGAGCTG  | 85              | NM_001012669.1   |
| <i>ACACA</i>                   | F: GATCCAGGCCATGCTAAG<br>R: CTGTTTCTCCAGCCACTC        | 103             | XM_024979607.1   |
| <i>SCD</i>                     | F: TCCGACCTAAGAGCCGAGAA<br>R: TGGGCAGCACTATTACCAG     | 200             | NM_173959.4      |
| <i>GAPDH</i>                   | F: GGGTCATCATCTCTGCACCT<br>R: GGTCATAAGTCCCTCCACGA    | 176             | NM_001034034.2   |

*IL-1 $\beta$* , interleukin-1 $\beta$ ; *IL-6*, interleukin-6; *IL-8*, interleukin-8; *TNF- $\alpha$* , tumor necrosis factor- $\alpha$ ; *FASN*, fatty acid synthase; *ACACA*, acetyl coenzyme-A carboxylase 1; *SCD*, stearoyl-CoA desaturase; *GAPDH*, glyceraldehyde-3-phosphate dehydrogenase.
